# Supplementary material
Source: Springer Nature journal article supplement (https://www.springerprofessional.de/resource/supplementary/13638_2010_121_MOESM6_ESM.pdf/11897084)
Supplement: MOESM6 [file 11897084]

Cluster tree topology

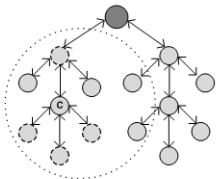

RCAPS solution

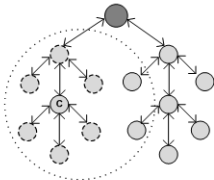

● PAN coordinator

○ FFD

○ Coordinators to do ranging with C coordinator
